# Supplementary material for: The remarkable adsorption capacity of zinc/nickel/copper-based metal–organic frameworks for thiophenic sulfurs
Source: Royal Society of Chemistry journal article supplement (doi:10.1039/c6ra22012f), 2016-01-01
Supplement: c6ra22012f1.pdf [file c6ra22012f1.pdf]

*Supporting information for*

**Remarkable Adsorption Capacity of Zinc/Nickel/Copper-Based  
Metal-Organic Frameworks for Thiophenic Compounds**

Tingting Wang,<sup>a</sup> Yaoyao Fang,<sup>a</sup> Wei Dai,<sup>\*a</sup> Lifeng Hu,<sup>a</sup> Na Ma,<sup>b</sup> and Le Yu,<sup>a</sup> <sup>a</sup>College  
of Chemistry and Life Science, Zhejiang Normal University, Zhejiang Province, Jinhua 321004,  
People's Republic of China

<sup>b</sup>College of Geography and Environmental Sciences, Zhejiang Normal University, Zhejiang  
Province, Jinhua 321004, People's Republic of China

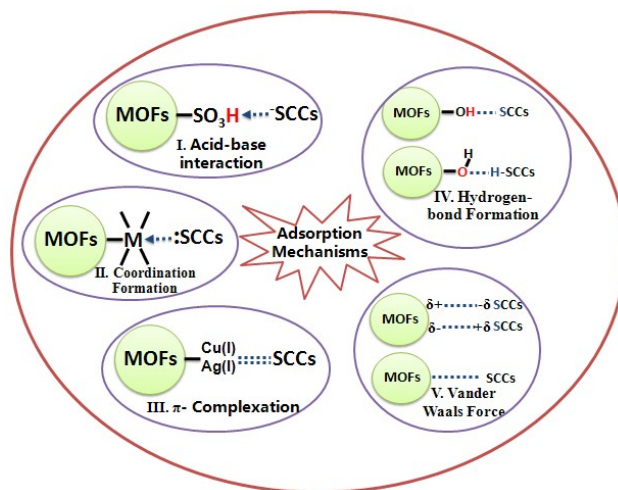

**Scheme S.I.1.** Summary of the main adsorption mechanisms

**Figure S.I. captions:**

**Fig. S.I.1** XRD analysis for Zn/Ni/Cu-BTC sample

**Fig. S.I.2** SEM image of Zn/Ni/Cu-BTC sample

**Fig. S.I.3** TGA of Zn/Ni/Cu-BTC sample under nitrogen atmosphere

**Fig. S.I.4** XRD patterns of Zn/Ni/Cu-BTC before and after 24h.

**Fig. S.I.5** N<sub>2</sub> adsorption–desorption isotherms of Zn/Ni/Cu-BTC before and after 24h.

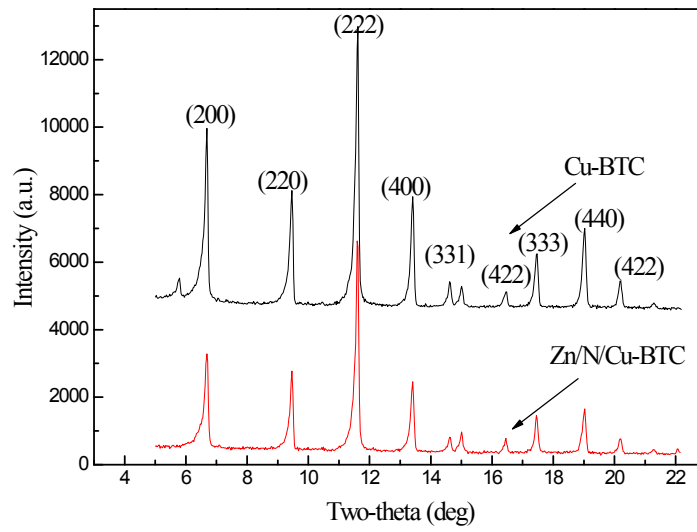

**Fig. S.I.1** XRD analysis for Cu-BTC and Zn/Ni/Cu-BTC sample

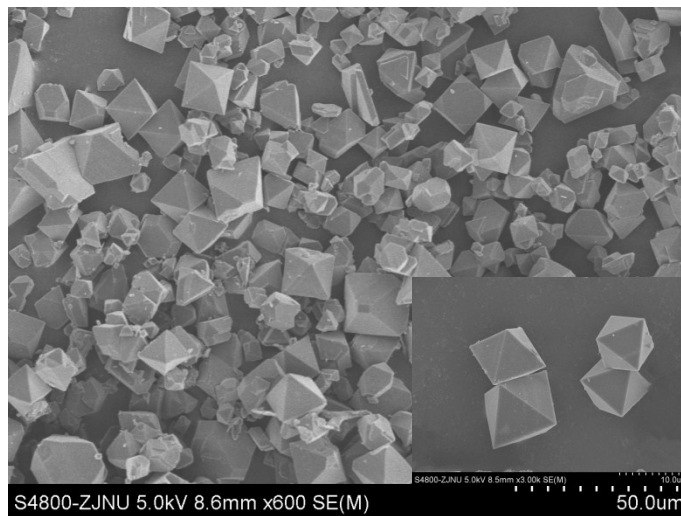

**Fig. S.I.2** SEM image of Zn/Ni/Cu-BTC sample

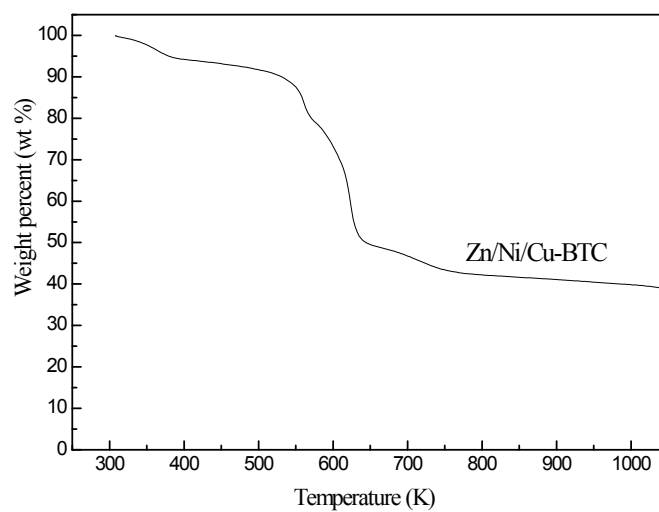

**Fig. S.I.3** TGA of Zn/Ni/Cu-BTC sample under nitrogen atmosphere

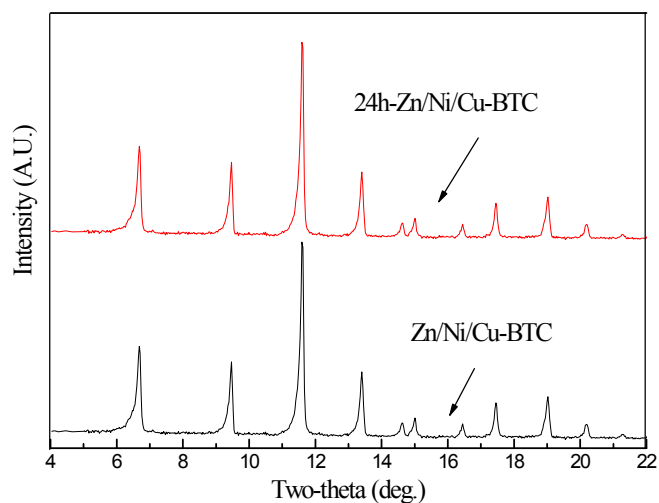

**Fig. S.I.4** XRD patterns of Zn/Ni/Cu-BTC before and after 24h.

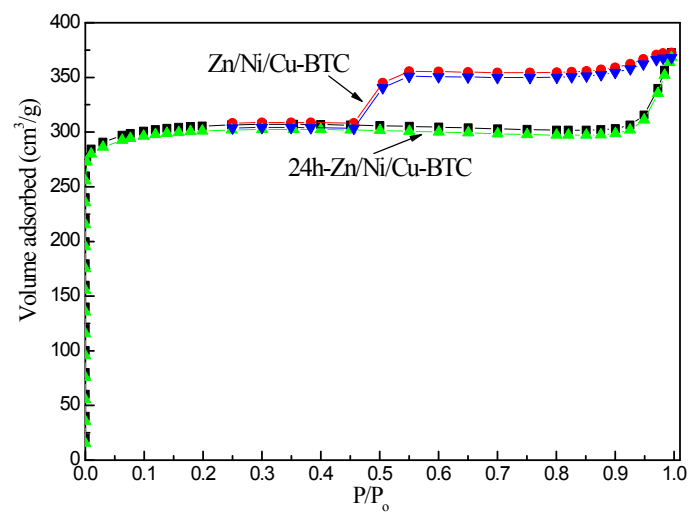

**Fig. S.I.5** N<sub>2</sub> adsorption–desorption isotherms of Zn/Ni/Cu-BTC before and after 24h.

**Table S.I. captions:**

**Table S.I.1** Textural properties of Cu-BTC, Zn/Cu-BTC and Zn/Ni/Cu-BTC

**Table S.I.2** Chemical composition of Zn/Ni/Cu-BTC by ICP

**Table S.I.3** Sulfur capacity of different adsorbents at ambient temperature and pressure

**Table S.I.1** Textural properties of Cu-BTC, Zn/Cu-BTC and Zn/Ni/Cu-BTC

| Samples      | BET surface area<br>(m <sup>2</sup> /g) | Pore volume<br>(cm <sup>3</sup> /g) | Reference |
|--------------|-----------------------------------------|-------------------------------------|-----------|
| Cu-BTC       | 1386                                    | 0.62                                | [2]       |
| Zn/Cu-BTC    | 1103                                    | 0.57                                | [2]       |
| Ni/Cu-BTC    | 1047                                    | 0.45                                | [a]       |
| Zn/Ni/Cu-BTC | 1229                                    | 0.53                                | This work |

**Table S.I.2** Chemical composition of Zn/Ni/Cu-BTC by ICP

| Elements | Mole (%) |
|----------|----------|
| C        | 26.45    |
| Zn       | 1.45     |
| Ni       | 1.51     |
| Cu       | 3.37     |
| H        | 27.78    |
| N        | 10.81    |
| O        | 28.63    |

**Table S.I.3** Sulfur capacity of different adsorbents at ambient temperature and pressure

| Adsorbent       | Adsorbate | ALO           |               | ARO           |               | MIO           |               | Reference |
|-----------------|-----------|---------------|---------------|---------------|---------------|---------------|---------------|-----------|
|                 |           | B.C.,<br>wt % | S.C.,<br>wt % | B.C.,<br>wt % | S.C.,<br>wt % | B.C.,<br>wt % | S.C.,<br>wt % |           |
| Cu-BTC          | DBT       | 3.21          | 6.15          | 2.68          | 3.85          | 2.97          | 4.82          | [2]       |
|                 | BT        | 2.25          | 4.45          | 1.88          | 2.70          | 2.08          | 3.37          | This work |
|                 | Th        | 2.01          | 3.99          | 1.74          | 2.45          | 1.93          | 3.12          | This work |
| Zn/Cu-BTC       | DBT       | 9.93          | 11.89         | 4.98          | 5.92          | 7.21          | 7.93          | [2]       |
|                 | BT        | 6.95          | 8.54          | 3.49          | 4.15          | 5.01          | 5.56          | This work |
|                 | Th        | 6.25          | 7.71          | 3.23          | 3.85          | 4.68          | 5.16          | This work |
| MOF-5/Cu(I)     | DBT       | 9.42          | 10.94         | 3.96          | 4.84          | 6.16          | 6.82          | [4]       |
| Zeolite-Y/Cu(I) | Th        | 5.50          | 7.54          | 0.61          | 1.73          | 0.70          | 1.41          | [32]      |
| A.C./Cu(I)      | Th        | 2.65          | 6.15          | 1.12          | 3.91          | 1.61          | 2.06          | [31]      |
| SBA-15/Cu(I)    | Th        | 6.48          | 8.52          | 1.14          | 3.92          | 0.95          | 2.11          | [31]      |
|                 | DBT       | 10.92         | 13.08         | 5.48          | 7.11          | 7.93          | 9.61          | This work |
|                 | BT        | 7.46          | 10.58         | 4.86          | 5.74          | 6.17          | 6.94          | This work |
| Zn/Ni/Cu-BTC    | Th        | 6.34          | 8.99          | 4.13          | 4.88          | 5.24          | 5.97          | This work |

B.C.: Breakthrough capacity, wt %; S.C.: Saturation capacity, wt %.

Reference [a]: J. Hu, H. J. Yu, W. Dai, X.Y. Yan, X. Hu and H. Huang, *RSC Adv.*,



2014, 4, 35124.
